# Supplementary material for: White matter connectivity in brain networks supporting social and affective processing predicts real-world social network characteristics
Source: PubMed Central journal article supplement (PMC9529948; doi:10.1038/s42003-022-03655-8), 2022-10-03
Supplement: 42003_2022_3655_MOESM2_ESM.pdf [file 42003_2022_3655_MOESM2_ESM.pdf]

## Supplementary Information

### Supplementary Note 1. Assessing relationships between covariates and social network position characteristics

Statistical tests were performed to investigate if covariates used in the current study were significantly associated with social network position characteristics. Associations between each social network position characteristic and continuous covariates were tested with Pearson correlations; associations between each social network position characteristic and categorical variables were assessed with *t*-tests.

**Age.** Age was not significantly associated with out-degree centrality ( $r = -0.017$ ,  $p = 0.855$ ), in-degree centrality ( $r = -0.106$ ,  $p = 0.267$ ), eigenvector centrality ( $r = -0.105$ ,  $p = 0.271$ ), betweenness centrality ( $r = 0.057$ ,  $p = 0.551$ ), or constraint ( $r = -0.089$ ,  $p = 0.348$ ).

**Gender.** Male and female subjects did not significantly differ in their out-degree centrality ( $t(110) = 1.20$ ,  $p = 0.232$ ), in-degree centrality ( $t(110) = 1.45$ ,  $p = 0.783$ ), eigenvector centrality ( $t(110) = 1.45$ ,  $p = 0.391$ ), betweenness centrality ( $t(110) = 1.45$ ,  $p = 0.160$ ), or constraint ( $t(110) = 1.45$ ,  $p = 0.151$ ).

**Handedness.** Left-handed and right-handed subjects did not significantly differ in their out-degree centrality ( $t(110) = 1.60$ ,  $p = 0.874$ ), in-degree centrality ( $t(110) = -0.216$ ,  $p = 0.830$ ), eigenvector centrality ( $t(110) = -0.226$ ,  $p = 0.822$ ), betweenness centrality ( $t(110) = 0.765$ ,  $p = 0.446$ ), or constraint ( $t(110) = -0.371$ ,  $p = 0.711$ ).

**Cohort.** Subjects in cohort 1 and subjects in cohort 2 did not significantly differ in their out-degree centrality ( $t(110) = -0.848$ ,  $p = 0.400$ ), in-degree centrality ( $t(110) = -0.994$ ,  $p = 0.323$ ), eigenvector centrality ( $t(110) = -0.906$ ,  $p = 0.368$ ), betweenness centrality ( $t(110) = -1.124$ ,  $p = 0.265$ ), or constraint ( $t(110) = -0.526$ ,  $p = 0.600$ ). Subjects in cohort 1 and subjects in cohort 3 did not significantly differ in their out-degree centrality ( $t(110) = -0.316$ ,  $p = 0.753$ ), in-degree centrality ( $t(110) = -0.282$ ,  $p = 0.779$ ), eigenvector centrality ( $t(110) = -0.055$ ,  $p = 0.957$ ), betweenness centrality ( $t(110) = -0.754$ ,  $p = 0.454$ ), or constraint ( $t(110) = -0.971$ ,  $p = 0.335$ ). Subjects in cohort 2 and subjects in cohort 3 did not significantly differ in their out-degree centrality ( $t(110) = 0.507$ ,  $p = 0.614$ ), in-degree centrality ( $t(110) = 0.691$ ,  $p = 0.492$ ), eigenvector centrality ( $t(110) = 0.895$ ,  $p = 0.373$ ), betweenness centrality ( $t(110) = 0.310$ ,  $p = 0.757$ ), or constraint ( $t(110) = -0.604$ ,  $p = 0.547$ ). The lack of significant differences in social network position characteristics across cohorts is to be expected given, for example, that we normalized data within cohort prior to aggregating data across cohorts for subsequent analyses.

**Extraversion.** Extraversion was significantly associated with out-degree centrality ( $r = 0.264$ ,  $p = 0.005$ ), in-degree centrality ( $r = 0.481$ ,  $p = 8.00 \times 10^{-8}$ ), eigenvector centrality ( $r = 0.373$ ,  $p = 5.16 \times 10^{-5}$ ), betweenness centrality ( $r = 0.330$ ,  $p = 3.73 \times 10^{-4}$ ), and constraint ( $r = 0.316$ ,  $p = 6.95 \times 10^{-4}$ ).

## **Supplementary Note 2. Testing if patterns of white matter microstructure across major white matter tracts are predictive of social network position characteristics**

We complemented our main analyses, which were specifically focused on tracts between regions implicated in social and affective processing, by conducting an exploratory analysis of major, well-established white matter tracts. To do so, we used Freesurfer's TRActs Constrained by UnderLying Anatomy (TRACULA) tool<sup>1</sup>, an algorithm for automated global probabilistic tractography, which reconstructs 18 major white matter tracts for each subject. We then performed the following procedure to characterize the predictors used in the predictive modeling analysis. Each subject's FA map was thresholded at 0.20. For each subject, each tract was thresholded at 20% of the maximum value, binarized, and used as a mask to extract the mean FA from the corresponding subject's FA image. This procedure yielded 18 predictors that captured a pattern of white matter microstructural integrity distributed across major white matter tracts in each subject's brain.

Similar to our main analyses, we first implemented a data-driven, machine learning approach to predict individuals' social network position characteristics based on their patterns of microstructural integrity distributed across these 18 well-established white matter tracts using a ridge regression-based algorithm (see Methods in the main text). Using a leave-one-subject-out cross-validation scheme, the algorithm significantly predicted individuals' eigenvector centrality ( $r = 0.215$ ,  $p = 0.011$ ) and betweenness centrality ( $r = 0.186$ ,  $p = 0.025$ ) based on patterns of white matter microstructural integrity distributed across all 18 white matter tracts (see Methods). Each reported correlation value reflects the relationship between the actual social network position characteristic values and the values predicted by a given model. This analytical procedure was then repeated while controlling for demographic characteristics (age, gender), extraversion, handedness, and cohort. Patterns of microstructural integrity across the 18 major white matter tracts were significantly predictive of in-degree centrality ( $r = 0.233$ ,  $p = 0.007$ ) and eigenvector centrality ( $r = 0.291$ ,  $p = 0.001$ ) when controlling for these variables.

## Assessing relations between social network position characteristics

Statistical tests were performed to investigate the relationships between the social network characteristics. Associations between each social network position were tested with Pearson correlations (Supplementary Table 1).

**Supplementary Table 1. Correlations between social network characteristics.**

|                        | Out-degree centrality | In-degree centrality | Eigenvector centrality | Betweenness centrality |
|------------------------|-----------------------|----------------------|------------------------|------------------------|
| In-degree centrality   | 0.51***               |                      |                        |                        |
| Eigenvector centrality | 0.87***               | 0.80***              |                        |                        |
| Betweenness centrality | 0.89***               | 0.59***              | 0.76***                |                        |
| Constraint             | 0.73***               | 0.72***              | 0.81***                | 0.68***                |

Note: Constraint was negated to yield a measure of brokerage. \*\*\* $p < .001$

**Supplementary Table 2. Functionally defined ROIs in the affective processing network.**

| ROI Label | Hemisphere | Voxel count | Region(s)                                | Notes                                      |
|-----------|------------|-------------|------------------------------------------|--------------------------------------------|
| Aff-1     | left       | 99          | rostral anterior cingulate cortex        |                                            |
| Aff-2     | left       | 273         | ventromedial prefrontal cortex           |                                            |
| Aff-3     | left       | 502         | dorsomedial prefrontal cortex            |                                            |
| Aff-4     | left       | 134         | insula                                   |                                            |
| Aff-5     | left       | 729         | orbitofrontal cortex                     |                                            |
| Aff-6     | left       | 224         | amygdala                                 | Masked using anatomical amygdala mask      |
| Aff-7     | left       | 261         | temporal pole                            | Masked using anatomical temporal pole mask |
| Aff-8     | left       | 332         | superior frontal gyrus                   |                                            |
| Aff-9     | left       | 209         | dorsal-rostral anterior cingulate cortex |                                            |
| Aff-10    | right      | 243         | amygdala                                 | Masked using anatomical amygdala mask      |
| Aff-11    | right      | 86          | caudal anterior cingulate cortex         |                                            |
| Aff-12    | right      | 304         | dorsomedial prefrontal cortex            |                                            |
| Aff-13    | right      | 147         | dorsal-rostral anterior cingulate cortex |                                            |
| Aff-14    | right      | 981         | inferior frontal gyrus                   |                                            |
| Aff-15    | right      | 198         | insula                                   |                                            |
| Aff-16    | right      | 106         | rostral anterior cingulate cortex        |                                            |
| Aff-17    | right      | 498         | temporal pole                            | Masked using anatomical temporal pole mask |
| Aff-18    | right      | 262         | ventromedial prefrontal cortex           |                                            |

*Note:* Where noted, cortical ROIs that were additionally masked using anatomical masks based on the Desikan-Killiany atlas as implemented in FreeSurfer and subcortical ROIs that were additionally masked based on anatomical masks based on automatic subcortical segmentation in FreeSurfer (see Methods for more details)<sup>2-4</sup>. These masks were generated for each participant using FreeSurfer's recon-all command.

**Supplementary Table 3. Functionally defined ROIs in the face processing network.**

| ROI Label | Hemisphere | Voxel count | Region(s)                          | Notes                                                          |
|-----------|------------|-------------|------------------------------------|----------------------------------------------------------------|
| Face-1    | left       | 224         | amygdala                           | Masked using anatomical amygdala mask                          |
| Face-2    | left       | 803         | inferior temporal gyrus            |                                                                |
| Face-3    | left       | 386         | posterior superior temporal sulcus |                                                                |
| Face-4    | left       | 459         | occipital pole                     |                                                                |
| Face-5    | left       | 90          | lingual cortex                     | Masked using anatomical lingual cortex mask                    |
| Face-6    | left       | 798         | lateral occipital cortex           | Masked using anatomical lateral occipital cortex mask          |
| Face-7    | left       | 892         | fusiform cortex                    | Masked using anatomical fusiform cortex mask                   |
| Face-8    | left       | 337         | inferior temporal cortex           | Masked using anatomical inferior temporal cortex mask          |
| Face-9    | right      | 243         | amygdala                           | Masked using anatomical amygdala mask                          |
| Face-10   | right      | 424         | inferior frontal gyrus             |                                                                |
| Face-11   | right      | 104         | lingual cortex                     | Masked using anatomical lingual cortex mask                    |
| Face-12   | right      | 980         | lateral occipital cortex           | Masked using anatomical lateral occipital cortex mask          |
| Face-13   | right      | 808         | fusiform cortex                    | Masked using anatomical fusiform cortex mask                   |
| Face-14   | right      | 282         | middle temporal cortex             | Masked using anatomical middle temporal cortex mask            |
| Face-15   | right      | 484         | inferior temporal cortex           | Masked using anatomical inferior temporal cortex mask          |
| Face-16   | right      | 230         | posterior superior temporal sulcus | Masked using anatomical superior temporal sulcus mask          |
| Face-17   | right      | 160         | temporal pole                      | Masked using anatomical temporal pole mask                     |
| Face-18   | right      | 354         | anterior inferior temporal cortex  | Masked using anatomical anterior inferior temporal cortex mask |

*Note:* Where noted, cortical ROIs that were additionally masked using anatomical masks based on the Desikan-Killiany atlas as implemented in FreeSurfer and subcortical ROIs that were additionally masked based on anatomical masks based on automatic subcortical segmentation in FreeSurfer (see Methods for more details)<sup>2-4</sup>. These masks were generated for each participant using FreeSurfer's recon-all command.

**Supplementary Table 4. Functionally defined ROIs in the mentalizing network.**

| ROI Label | Hemisphere | Voxel count | Region(s)                                        | Notes |
|-----------|------------|-------------|--------------------------------------------------|-------|
| Ment-1    | left       | 1013        | precuneus                                        |       |
| Ment-2    | left       | 586         | dorsomedial prefrontal cortex                    |       |
| Ment-3    | left       | 341         | ventromedial prefrontal cortex                   |       |
| Ment-4    | left       | 77          | insula                                           |       |
| Ment-5    | left       | 1661        | angular gyrus                                    |       |
| Ment-6    | left       | 733         | supramaginal gyrus                               |       |
| Ment-7    | left       | 459         | posterior superior temporal sulcus               |       |
| Ment-8    | left       | 154         | middle temporal gyrus                            |       |
| Ment-9    | left       | 676         | temporal pole                                    |       |
| Ment-10   | right      | 221         | ventromedial prefrontal cortex                   |       |
| Ment-11   | right      | 820         | dorsomedial prefrontal cortex                    |       |
| Ment-12   | right      | 1024        | precuneus                                        |       |
| Ment-13   | right      | 2127        | inferior frontal gyrus, dorsal prefrontal cortex |       |
| Ment-14   | right      | 1169        | temporal pole, anterior temporal cortex          |       |
| Ment-15   | right      | 3374        | occipitotemporal cortex                          |       |
| Ment-16   | right      | 1003        | supramaginal gyrus                               |       |
| Ment-17   | right      | 282         | posterior superior temporal sulcus               |       |
| Ment-18   | right      | 388         | supplementary motor cortex                       |       |

*Note:* Where noted, cortical ROIs that were additionally masked using anatomical masks based on the Desikan-Killiany atlas as implemented in FreeSurfer and subcortical ROIs that were additionally masked based on anatomical masks based on automatic subcortical segmentation in FreeSurfer (see Methods for more details)<sup>2-4</sup>. These masks were generated for each participant using FreeSurfer's recon-all command.

**Supplementary Table 5. Functionally defined ROIs in the mirroring network.**

| ROI Label | Hemisphere | Voxel count | Region(s)                                | Notes |
|-----------|------------|-------------|------------------------------------------|-------|
| Mirr-1    | left       | 1576        | lateral occipital cortex                 |       |
| Mirr-2    | left       | 529         | temporoparietal junction                 |       |
| Mirr-3    | left       | 1439        | precentral gyrus, inferior frontal gyrus |       |
| Mirr-4    | left       | 2608        | superior parietal lobule                 |       |
| Mirr-5    | left       | 956         | supramarginal gyrus, postcentral gyrus   |       |
| Mirr-6    | left       | 703         | premotor cortex                          |       |
| Mirr-7    | right      | 291         | supplementary motor cortex               |       |
| Mirr-8    | right      | 347         | precuneus                                |       |
| Mirr-9    | right      | 743         | premotor cortex                          |       |
| Mirr-10   | right      | 1123        | supramarginal gyrus                      |       |
| Mirr-11   | right      | 378         | temporoparietal junction                 |       |
| Mirr-12   | right      | 390         | lateral occipital cortex                 |       |
| Mirr-13   | right      | 330         | lingual cortex                           |       |
| Mirr-14   | right      | 1053        | precentral gyrus, inferior frontal gyrus |       |
| Mirr-15   | right      | 2766        | occipitotemporal cortex                  |       |
| Mirr-16   | right      | 472         | occipital pole                           |       |
| Mirr-17   | right      | 2872        | superior parietal lobule                 |       |
| Mirr-18   | right      | 36          | posterior cingulate cortex               |       |
| Mirr-19   | right      | 542         | supramarginal gyrus, postcentral gyrus   |       |

*Note:* Where noted, cortical ROIs that were additionally masked using anatomical masks based on the Desikan-Killiany atlas as implemented in FreeSurfer and subcortical ROIs that were additionally masked based on anatomical masks based on automatic subcortical segmentation in FreeSurfer (see Methods for more details)<sup>2-4</sup>. These masks were generated for each participant using FreeSurfer's recon-all command.

## Supplementary References

1. Yendiki, A. *et al.* Automated probabilistic reconstruction of white-matter pathways in health and disease using an atlas of the underlying anatomy. *Front. Neuroinform.* **5**, 5–23 (2011).
2. Fischl, B. *et al.* Whole brain segmentation: automated labeling of neuroanatomical structures in the human brain. *Neuron* **33**, 341–355 (2002).
3. Fischl, B. FreeSurfer. *Neuroimage* **62**, 774–781 (2012).
4. Desikan, R. S. *et al.* An automated labeling system for subdividing the human cerebral cortex on MRI scans into gyral based regions of interest. *Neuroimage* **31**, 968–980 (2006).
